# Supplementary figures and images for: DNA-binding mechanisms of human and mouse cGAS: a comparative MD and MM/GBSA study
Source: Royal Society of Chemistry journal article supplement (doi:10.1039/d0cp04162a), 2020-01-01

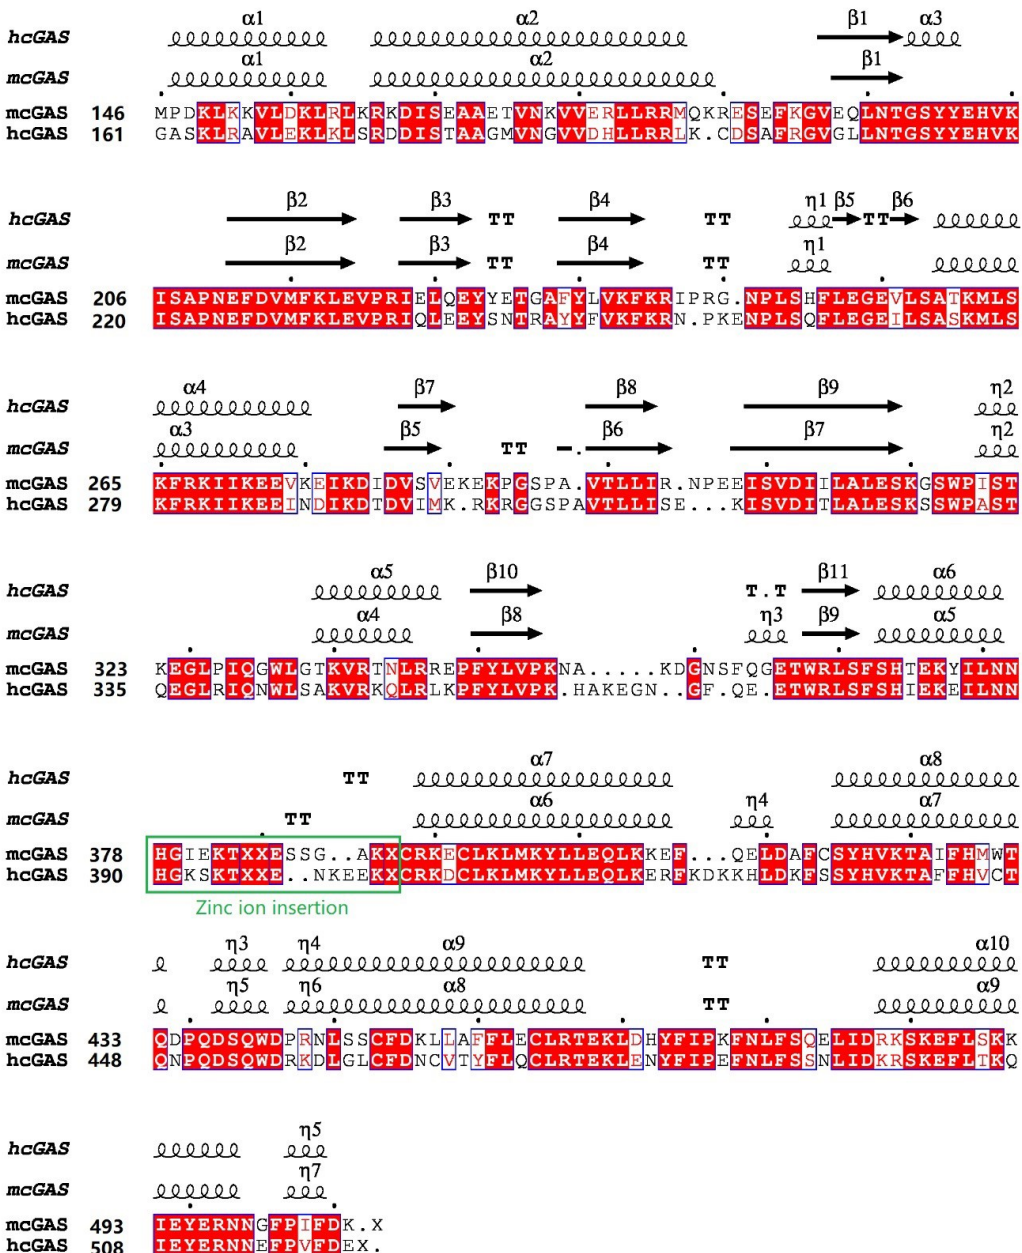

Supplement: d0cp04162a2.pdf [file d0cp04162a2.pdf]

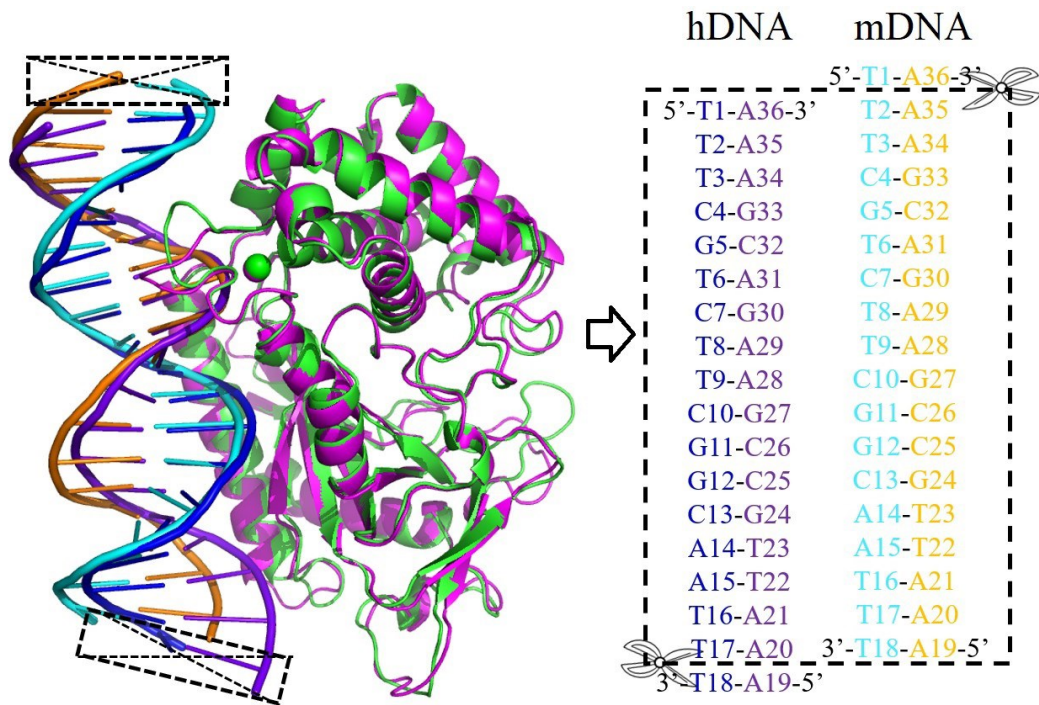

Supplement: d0cp04162a3.pdf [file d0cp04162a3.pdf]

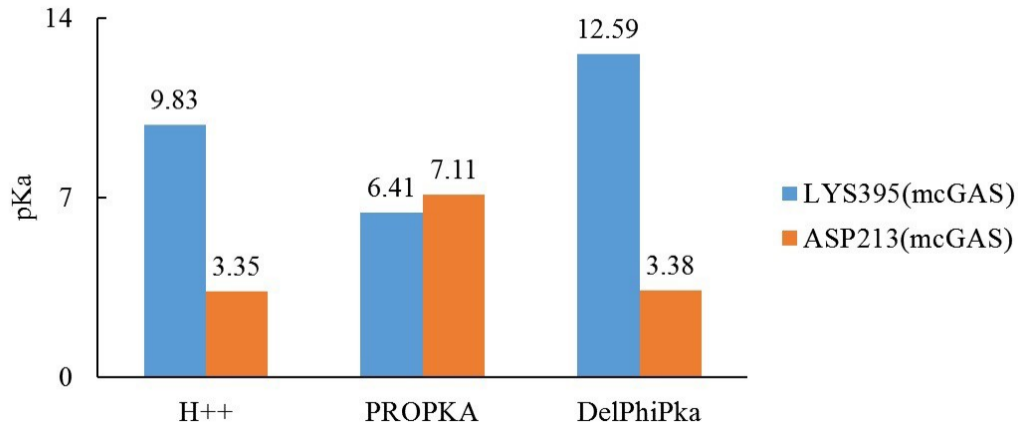

Supplement: d0cp04162a4.pdf [file d0cp04162a4.pdf]

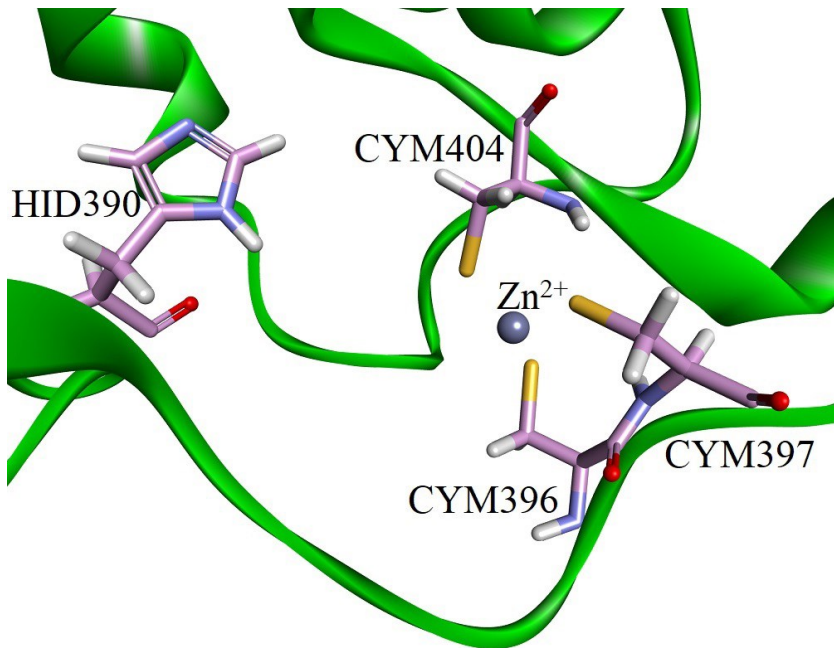

Supplement: d0cp04162a5.pdf [file d0cp04162a5.pdf]

(a)

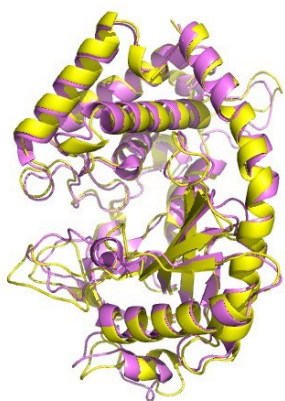

RMSD=2.427±0.189Å

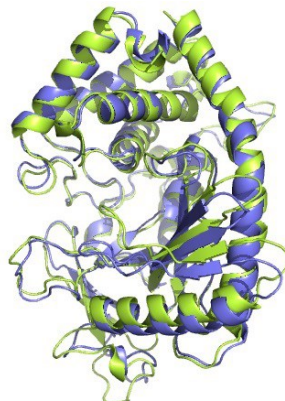

RMSD=2.024±0.109Å

(b)

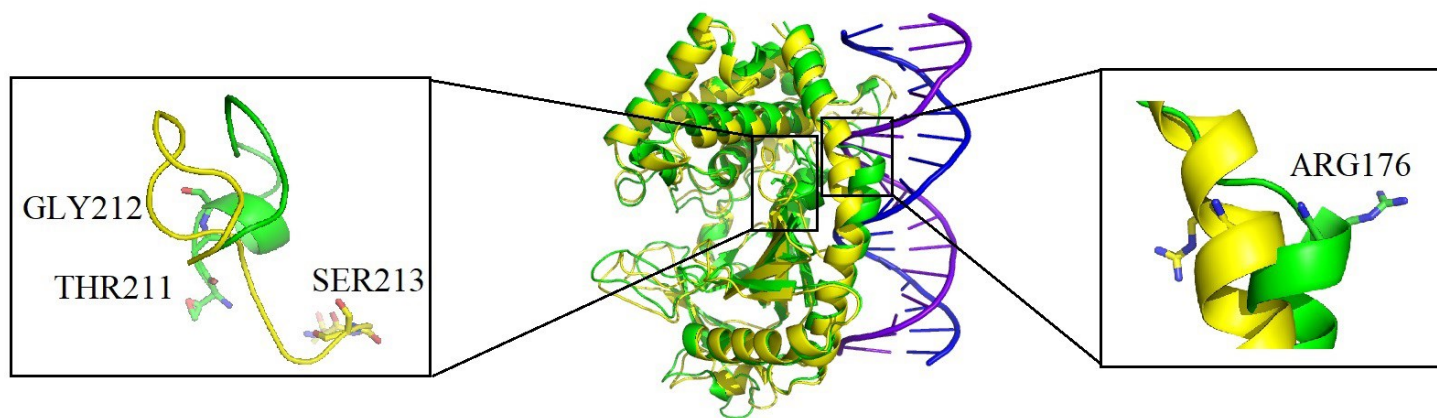

(c)

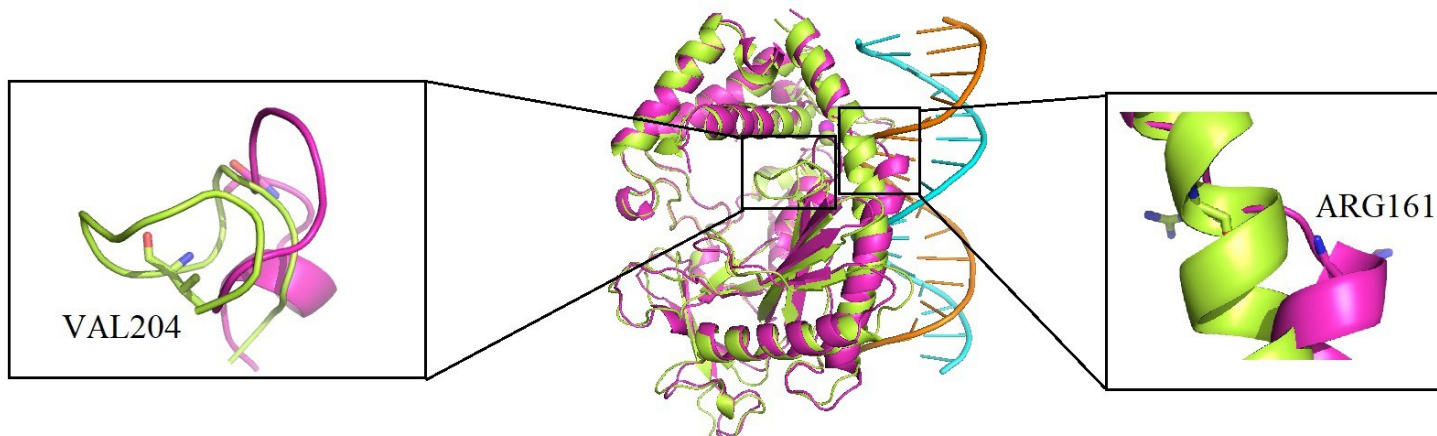

Supplement: d0cp04162a6.pdf [file d0cp04162a6.pdf]

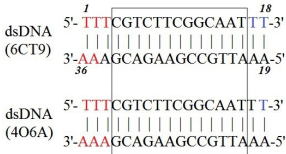

Supplement: d0cp04162a7.pdf [file d0cp04162a7.pdf]
